# Supplementary material for: Influences of solvents and monomer concentrations on the electrochemical performance and structural properties of electrodeposited PEDOT films: a comparative study in water and acetonitrile
Source: Royal Society of Chemistry journal article supplement (doi:10.1039/d4ra03543g), 2024-01-01
Supplement: d4ra03543g1.pdf [file d4ra03543g1.pdf]

## **Electronic Supplementary Information (ESI)**

# **Influences of Solvents and Monomer Concentrations on the Electrochemical Performance and Structural Properties of Electrodeposited PEDOT Films: A Comparative Study in Water and Acetonitrile**

Yang Zhang,<sup>a</sup> Linze Li<sup>\*a</sup> and Bingwei He<sup>\*a</sup>

<sup>a</sup> School of Mechanical Engineering and Automation, Fuzhou University, Fuzhou 350108, China.

\*Corresponding authors: E-mail: lzli@fzu.edu.cn; mebwhe@fzu.edu.cn

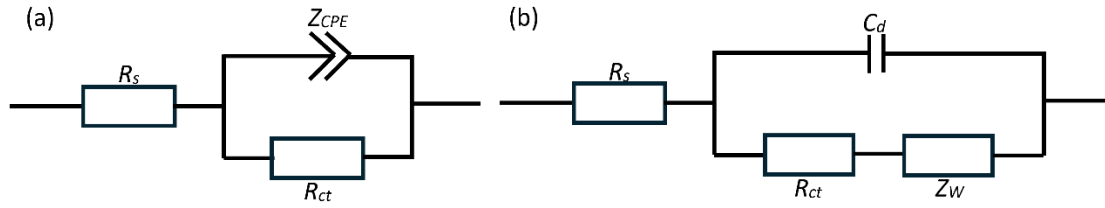

Fig. S-1 Equivalent circuits. (a) Model A using for the PEDOT electrodes deposited at 1 mM concentration; (b) Model B using for PEDOT electrodes deposited at other concentrations. Therein,  $R_s$  represented the solution resistance,  $R_{ct}$  signified the charge transfer resistance,  $Z_{CPE}$  stood for the constant phase element,  $Z_w$  indicated the Warburg impedance,  $C_d$  symbolized the capacitance. And the impedance of the CPE is sufficiently described as  $Z_{CPE}=1/(Y_0(j\omega)^n)$ , where  $Y_0$  is the parameter containing the capacitance information,  $\omega$  is angular frequency and  $n$  is a constant ranging from 0 to 1.

Table S-1 Nyquist curve fitting results

| Solvent      | EDOT Concentration (mM) | Circuit Model | $R_s$ ( $\Omega$ ) | $R_{ct}$ ( $\Omega$ ) | $Y_0$ ( $Fs^{n-1}$ )  | $n(0 < n < 1)$        |
|--------------|-------------------------|---------------|--------------------|-----------------------|-----------------------|-----------------------|
| Water        | 1                       | Model A       | 77.9               | $4.44 \times 10^4$    | $1.56 \times 10^{-5}$ | 0.809                 |
| Acetonitrile | 1                       |               | 81.8               | $2.16 \times 10^5$    | $3.13 \times 10^{-5}$ | 0.919                 |
| Solvent      | EDOT Concentration (mM) | Circuit Model | $R_s$ ( $\Omega$ ) | $R_{ct}$ ( $\Omega$ ) | $Z_w$ ( $\Omega$ )    | $C_d$ (F)             |
| Water        | 5                       | Model B       | 109.4              | 717.4                 | 1450.0                | $3.22 \times 10^{-5}$ |
|              | 10                      |               | 101.2              | 238.3                 | 589.8                 | $9.34 \times 10^{-5}$ |
|              | 15                      |               | 100.2              | 204.5                 | 326.5                 | $1.16 \times 10^{-4}$ |
|              | 20                      |               | 90.5               | 202.8                 | 308.9                 | $1.76 \times 10^{-4}$ |
| Acetonitrile | 10                      |               | 75.7               | 97.6                  | 136.0                 | $3.66 \times 10^{-4}$ |
|              | 20                      |               | 77.6               | 93.6                  | 120.0                 | $7.52 \times 10^{-4}$ |
|              | 50                      |               | 64.9               | 78.7                  | 98.7                  | $1.71 \times 10^{-3}$ |
|              | 100                     |               | 60.7               | 72.4                  | 96.9                  | $2.17 \times 10^{-3}$ |

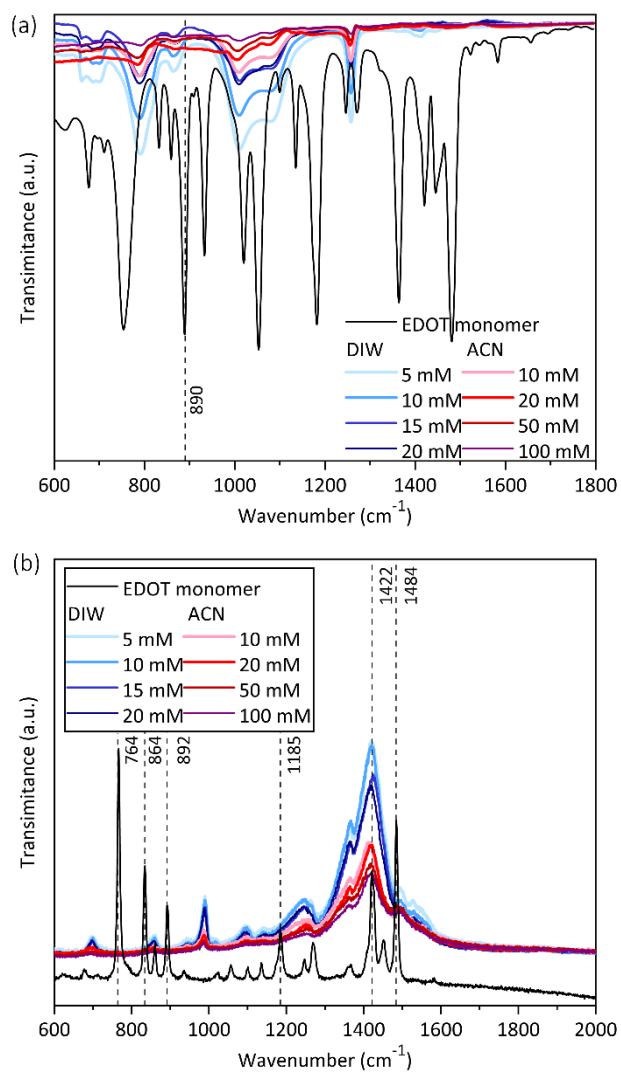

Fig. S-2 Comparison of (a) infrared and (b) Raman spectra before and after EDOT polymerization

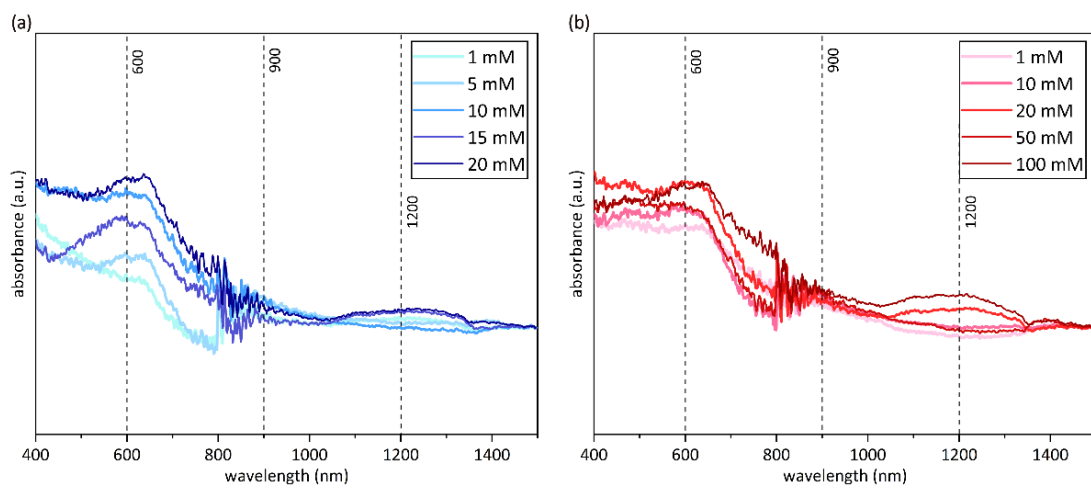

Fig. S-3 UV-visible absorption spectroscopy after PEDOT electrodeposition in (a) water and (b) acetonitrile at different monomer concentrations.

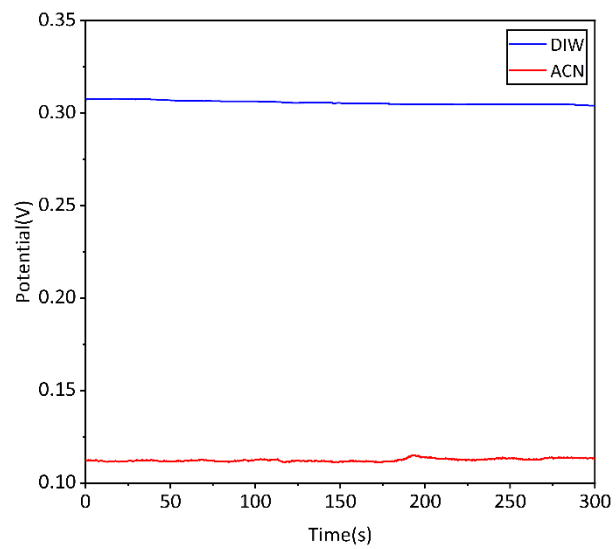

Fig. S-4 The open circuit potential detected in water and acetonitrile
